# Supplementary material for: Improved Computational Target Site Prediction for Pentatricopeptide Repeat RNA Editing Factors
Source: PubMed Central journal article supplement (PMC3675099; doi:10.1371/journal.pone.0065343), 2013-06-06
Supplement: pone.0065343.s003.pdf [file pone.0065343.s003.pdf]

|              |            | PPR position | 26 | 25 | 24 | 23 | 22 | 21 | 20 | 19   | 18   | 17   | 16   | 15   | 14   | 13   | 12   | 11   | 10   | 9    | 8    | 7    | 6    | 5    | 4    | 3    | 2    | 1    | P-value  | Rank without L, L2 and S2 | P-value  | Rank with L, L2 and S2 |    |  |  |
|--------------|------------|--------------|----|----|----|----|----|----|----|------|------|------|------|------|------|------|------|------|------|------|------|------|------|------|------|------|------|------|----------|---------------------------|----------|------------------------|----|--|--|
| Gene name    | OGR1       | motifs       |    |    |    |    |    |    |    |      |      |      |      |      |      |      |      |      |      |      |      | P    | P    | P    | L    | S    | P    | L2   | S2       |                           |          |                        |    |  |  |
| AGI number   | Os12g17080 | 6            |    |    |    |    |    |    |    |      |      |      |      |      |      |      |      |      |      |      |      | S    | T    | G    | V    | N    | N    | L    | G        |                           |          |                        |    |  |  |
| Type         | DYW        | 1'           |    |    |    |    |    |    |    |      |      |      |      |      |      |      |      |      |      |      |      | D    | N    | N    | N    | T    | D    | N    | D        |                           |          |                        |    |  |  |
| Species      | Os         | A            |    |    |    |    |    |    |    |      |      |      |      |      |      |      |      |      |      |      |      | 0.11 | 0.73 | 0.17 | 0.34 | 0    | 0.09 | 0.2  | 0.09     |                           |          |                        |    |  |  |
| Localization | mt         | C            |    |    |    |    |    |    |    |      |      |      |      |      |      |      |      |      |      |      |      | 0.34 | 0.05 | 0.44 | 0.14 | 0.78 | 0.25 | 0.38 | 0.07     |                           |          |                        |    |  |  |
| ref.         | 31         | G            |    |    |    |    |    |    |    |      |      |      |      |      |      |      |      |      |      |      |      | 0.45 | 0.22 | 0    | 0.12 | 0.14 | 0.06 | 0.7  |          |                           |          |                        |    |  |  |
|              |            | U            |    |    |    |    |    |    |    |      |      |      |      |      |      |      |      |      |      |      |      | 0.1  | 0    | 0.39 | 0.4  | 0.09 | 0.52 | 0.36 | 0.14     |                           |          |                        |    |  |  |
| cox2         | 167        | Target seq   | C  | U  | U  | C  | C  | U  | U  | A    | U    | U    | C    | U    | G    | A    | U    | U    | U    | U    | U    | G    | G    | U    | U    | U    | C    | G    | 2.44E-02 | 48                        | 3.86E-03 | 12                     |    |  |  |
|              |            | score        |    |    |    |    |    |    |    |      |      |      |      |      |      |      |      |      |      |      |      | 0.45 | 0.22 | 0.39 | 0.40 | 0.09 | 0.52 | 0.38 | 0.70     |                           |          |                        |    |  |  |
| cox3         | 572        | Target seq   | A  | G  | U  | A  | G  | C  | A  | A    | C    | C    | G    | U    | U    | U    | U    | A    | C    | U    | U    | G    | G    | C    | U    | C    | U    | A    | G        | 2.44E-03                  | 5        | 4.70E-04               | 1  |  |  |
|              |            | score        |    |    |    |    |    |    |    |      |      |      |      |      |      |      |      |      |      |      |      | 0.45 | 0.22 | 0.44 | 0.40 | 0.78 | 0.52 | 0.20 | 0.70     |                           |          |                        |    |  |  |
| nad4         | 458        | Target seq   | A  | A  | A  | G  | C  | U  | U  | U    | C    | U    | G    | U    | C    | G    | A    | A    | C    | U    | U    | G    | G    | C    | U    | U    | C    | U    | A        | 7.05E-02                  | 70       | 2.67E-02               | 71 |  |  |
|              |            | score        |    |    |    |    |    |    |    |      |      |      |      |      |      |      |      |      |      |      |      | 0.45 | 0.73 | 0.39 | 0.14 | 0.14 | 0.25 | 0.38 | 0.70     |                           |          |                        |    |  |  |
| ccmC         | 1457       | Target seq   | C  | G  | A  | U  | C  | U  | U  | A    | C    | U    | C    | A    | U    | C    | A    | A    | A    | U    | U    | G    | G    | C    | A    | C    | U    | C    | A        | 1.88E-03                  | 4        | 2.46E-03               | 5  |  |  |
|              |            | score        |    |    |    |    |    |    |    |      |      |      |      |      |      |      |      |      |      |      |      | 0.45 | 0.22 | 0.44 | 0.40 | 0.09 | 0.25 | 0.36 | 0.09     |                           |          |                        |    |  |  |
| ccmC         | 401        | Target seq   | A  | A  | U  | U  | U  | G  | U  | G    | A    | A    | U    | U    | U    | C    | U    | A    | A    | U    | U    | G    | A    | U    | C    | G    | C    | C    | G        | 8.02E-03                  | 9        | 3.01E-03               | 6  |  |  |
|              |            | score        |    |    |    |    |    |    |    |      |      |      |      |      |      |      |      |      |      |      |      | 0.45 | 0.22 | 0.44 | 0.40 | 0.78 | 0.25 | 0.36 | 0.09     |                           |          |                        |    |  |  |
| nad2         | 416        | Target seq   | A  | A  | U  | G  | A  | U  | C  | G    | C    | C    | G    | U    | G    | U    | U    | C    | U    | U    | U    | C    | A    | U    | G    | C    | U    | G    | G        | 5.34E-04                  | 2        | 3.20E-03               | 9  |  |  |
|              |            | score        |    |    |    |    |    |    |    |      |      |      |      |      |      |      |      |      |      |      |      | 0.45 | 0.22 | 0.44 | 0.34 | 0.78 | 0.52 | 0.38 | 0.09     |                           |          |                        |    |  |  |
| nad4         | 433        | Target seq   | G  | C  | A  | U  | G  | C  | U  | G    | G    | A    | U    | C    | U    | U    | C    | U    | A    | C    | U    | U    | A    | U    | U    | C    | U    | A    | U        | 8.02E-03                  | 10       | 7.97E-03               | 20 |  |  |
|              |            | score        |    |    |    |    |    |    |    |      |      |      |      |      |      |      |      |      |      |      |      | 0.34 | 0.73 | 0.39 | 0.12 | 0.78 | 0.52 | 0.06 | 0.70     |                           |          |                        |    |  |  |
| nad4         | 458ue      | Target seq   | A  | A  | A  | G  | C  | U  | U  | U    | C    | U    | G    | U    | C    | G    | A    | A    | C    | U    | U    | G    | G    | C    | U    | C    | C    | U    | A        | 5.77E-03                  | 6        | 5.20E-03               | 15 |  |  |
|              |            | score        |    |    |    |    |    |    |    |      |      |      |      |      |      |      |      |      |      |      |      | 0.10 | 0.73 | 0.39 | 0.40 | 0.78 | 0.52 | 0.20 | 0.14     |                           |          |                        |    |  |  |
| Gene name    | MPR25      | motifs       |    |    |    |    |    |    |    | S    | P    | L    | S    | P    | L    | S    | P    | L    | S    | P    | L    | S    | P    | L    | S    | P    | L    | S    | P        | L2                        | S2       |                        |    |  |  |
| AGI number   | Os04g51350 | 6            |    |    |    |    |    |    |    | A    | N    | S    | N    | N    | V    | S    | N    | L    | N    | N    | T    | S    | N    | A    | T    | T    | L    | C    |          |                           |          |                        |    |  |  |
| Type         | E          | 1'           |    |    |    |    |    |    |    | P    | D    | T    | N    | T    | D    | N    | D    | P    | D    | D    | G    | D    | T    | N    | S    | D    | T    | N    |          |                           |          |                        |    |  |  |
| Species      | Os         | A            |    |    |    |    |    |    |    | 0.25 | 0.09 | 0.25 | 0.14 | 0.04 | 0.25 | 0.70 | 0.09 | 0.20 | 0.15 | 0.09 | 0.40 | 0.06 | 0.04 | 0.34 | 0.45 | 0.04 | 0.20 | 0.91 |          |                           |          |                        |    |  |  |
| Localization | mt         | C            |    |    |    |    |    |    |    | 0.25 | 0.14 | 0.25 | 0.41 | 0.00 | 0.25 | 0.04 | 0.14 | 0.00 | 0.07 | 0.14 | 0.28 | 0.85 | 0.00 | 0.12 | 0.17 | 0.93 | 0.06 | 0.00 |          |                           |          |                        |    |  |  |
| ref.         | 32         | G            |    |    |    |    |    |    |    | 0.25 | 0.52 | 0.25 | 0.16 | 0.27 | 0.25 | 0.13 | 0.52 | 0.48 | 0.55 | 0.52 | 0.14 | 0.10 | 0.27 | 0.40 | 0.18 | 0.03 | 0.36 | 0.00 |          |                           |          |                        |    |  |  |
|              |            | U            |    |    |    |    |    |    |    | 0.25 | 0.52 | 0.25 | 0.16 | 0.27 | 0.25 | 0.13 | 0.52 | 0.48 | 0.55 | 0.52 | 0.14 | 0.10 | 0.27 | 0.40 | 0.18 | 0.03 | 0.36 | 0.00 |          |                           |          |                        |    |  |  |
| nad5         | 1580       | Target seq   | C  | A  | A  | A  | C  | U  | A  | A    | U    | A    | C    | C    | U    | A    | U    | U    | C    | U    | U    | G    | U    | U    | A    | G    | U    | A    | 4.17E-04 | 3                         | 1.96E-05 | 2                      |    |  |  |
|              |            | score        |    |    |    |    |    |    |    | 0.25 | 0.52 | 0.25 | 0.29 | 0.69 | 0.25 | 0.70 | 0.52 | 0.48 | 0.23 | 0.52 | 0.28 | 0.10 | 0.27 | 0.40 | 0.45 | 0.93 | 0.36 | 0.91 |          |                           |          |                        |    |  |  |

Figure S3
